# Supplementary material
Source: PubMed Central journal article supplement (PMC8637495)
Supplement: NIHMS1523227-supplement-Supplement_2.pdf [file NIHMS1523227-supplement-Supplement_2.pdf]

## **Authors. Title. Journal**

Christopher M. Clark,<sup>1,6</sup> Jennifer Phelan,<sup>2</sup> Prakash Doraiswamy,<sup>2</sup> John Buckley,<sup>2</sup> James C. Cajka,<sup>2</sup> Robin L. Dennis,<sup>3</sup> Jason Lynch,<sup>4</sup> Christopher G. Nolte,<sup>5</sup> and Tanya L. Spero<sup>5</sup>.  
Atmospheric deposition and exceedances of critical loads from 1800–2025 for the conterminous United States. *Ecological Applications*.

---

## **Data S1**

### **Summary of CL exceedances nationally**

---

## **Author addresses**

<sup>1</sup>U.S. Environmental Protection Agency (8623-P), Office of Research and Development, National Center for Environmental Assessment, 1200 Pennsylvania Ave NW, Washington DC 20460 USA

<sup>2</sup>RTI International, 3040 East Cornwallis Rd., P.O. Box 12194, Research Triangle Park, NC 27709 USA

<sup>3</sup>Retired. U.S. Environmental Protection Agency, National Exposure Research Laboratory, Research Triangle Park, NC 27709 USA

<sup>4</sup>U.S. Environmental Protection Agency, Office of Atmospheric Programs, 1200 Pennsylvania Ave NW, Washington DC 20460 USA

<sup>5</sup>U.S. Environmental Protection Agency, National Exposure Research Laboratory, Research Triangle Park, NC 27709 USA

<sup>6</sup>E-mail: [clark.christopher@epa.gov](mailto:clark.christopher@epa.gov)

---

## File list (files found within DataS1.zip)

TableS1.csv

## Description

Data S1 contains a single file, TableS1.csv, which contains two tables. The first table (i.e., cells A1 to AE21) contains information on the area of critical load exceedances for six CL types (i.e., terrestrial acidification, aquatic acidification, forest-tree health, nitrate leaching, lichen community composition, and plant community composition) and three percentages (minimum, 10<sup>th</sup> percentile, 50<sup>th</sup> percentile) from 1800-2025 (four scenarios for the year 2025), and for six constant deposition rates (2.5, 5, 7.5, 10, 12.5, and 15 kg N ha<sup>-1</sup> yr<sup>-1</sup>). The last row of the first table has the same information, but presented for the aquatic acidification CL as a count of water bodies rather than an area of 12 x 12 km grid cells. The second table (i.e., A25 to AD52) contains information on the area with 0-6 CL types exceeded for the three percentages (minimum, 10<sup>th</sup> percentile, 50<sup>th</sup> percentile) from 1800-2025 (four scenarios for the year 2025), and for six constant deposition rates (2.5, 5, 7.5, 10, 12.5, and 15 kg N ha<sup>-1</sup> yr<sup>-1</sup>). It also presents information on the area with insufficient data (i.e., sample size less than 5), and area with no data.

---
